# Supplementary material for: Lipopeptides Produced by Bacillus mojavensis P1709 as an Efficient Tool to Maintain Postharvest Cherry Tomato Quality and Quantity
Source: MDPI journal article supplement (doi:10.3390/agriculture12050609), 2022-04-26
Supplement: s1 [file s1]

## Supplement Material

### Statistically significant differences for Figure 4 calculated with Wilcoxon signed rank

Table S1. Statistically significant differences for inhibition of radial growth at different APF concentrations

| APF concentration, g L <sup>-1</sup> | 0.5                             | 2 | 5 | 10 | 20 |
|--------------------------------------|---------------------------------|---|---|----|----|
| 0.5                                  |                                 |   |   |    |    |
| 2                                    | 0                               |   |   |    |    |
| 5                                    | 0                               | 6 |   |    |    |
| 10                                   | 0                               | 0 | 0 |    |    |
| 20                                   | 0                               | 0 | 0 | 0  |    |
|                                      | significant difference (p<0.05) |   |   |    |    |
|                                      | not significant                 |   |   |    |    |

Table S2. Statistically significant differences for inhibition T2 and HT-2 toxins production at different APF concentrations

| APF concentration, g L <sup>-1</sup> | 0.5                             | 2    | 5 | 10 | 20 |
|--------------------------------------|---------------------------------|------|---|----|----|
| 0.5                                  |                                 |      |   |    |    |
| 2                                    | 1                               |      |   |    |    |
| 5                                    | 1                               | 0    |   |    |    |
| 10                                   | 1                               | 5    | 2 |    |    |
| 20                                   | 0                               | 2.50 | 5 | 0  |    |
|                                      | significant difference (p<0.05) |      |   |    |    |
|                                      | not significant                 |      |   |    |    |

### Statistically significant differences for Figure 5 calculated with Wilcoxon signed rank

Table S3. Statistically significant differences for disease incidence of cherry tomato fruits at different APF concentrations at day 2

| APF concentration, g L <sup>-1</sup> | 0                               | 0.5 | 2 | 5 | 10 | 20 |
|--------------------------------------|---------------------------------|-----|---|---|----|----|
| 0                                    |                                 |     |   |   |    |    |
| 0.5                                  | 0                               |     |   |   |    |    |
| 2                                    | 0                               | 7   |   |   |    |    |
| 5                                    | 0                               | 0   | 0 |   |    |    |
| 10                                   | 0                               | 0   | 0 | 0 |    |    |
| 20                                   | 0                               | 0   | 0 | 0 | 0  |    |
|                                      | significant difference (p<0.05) |     |   |   |    |    |
|                                      | not significant                 |     |   |   |    |    |

Table S4. Statistically significant differences for disease incidence of cherry tomato fruits at different APF concentrations at day 3

| APF concentration, g L <sup>-1</sup> | 0                               | 0.5 | 2 | 5 | 10 | 20 |
|--------------------------------------|---------------------------------|-----|---|---|----|----|
| 0                                    |                                 |     |   |   |    |    |
| 0.5                                  | 0                               |     |   |   |    |    |
| 2                                    | 0                               | 0   |   |   |    |    |
| 5                                    | 0                               | 0   | 0 |   |    |    |
| 10                                   | 0                               | 0   | 0 | 4 |    |    |
| 20                                   | 0                               | 0   | 0 | 0 | 0  |    |
|                                      | significant difference (p<0.05) |     |   |   |    |    |
|                                      | not significant                 |     |   |   |    |    |

Table S5. Statistically significant differences for disease incidence of cherry tomato fruits at different APF concentrations at day 4

| APF concentration, g L <sup>-1</sup> | 0                               | 0.5 | 2 | 5 | 10 | 20 |
|--------------------------------------|---------------------------------|-----|---|---|----|----|
| 0                                    |                                 |     |   |   |    |    |
| 0.5                                  | 0                               |     |   |   |    |    |
| 2                                    | 0                               | 0   |   |   |    |    |
| 5                                    | 0                               | 0   | 0 |   |    |    |
| 10                                   | 0                               | 0   | 0 | 0 |    |    |
| 20                                   | 0                               | 0   | 0 | 0 | 0  |    |
|                                      | significant difference (p<0.05) |     |   |   |    |    |
|                                      | not significant                 |     |   |   |    |    |

Table S6. Statistically significant differences for disease incidence of cherry tomato fruits at different APF concentrations at day 5

| APF concentration, g L <sup>-1</sup> | 0                               | 0.5 | 2 | 5 | 10 | 20 |
|--------------------------------------|---------------------------------|-----|---|---|----|----|
| 0                                    |                                 |     |   |   |    |    |
| 0.5                                  | 0                               |     |   |   |    |    |
| 2                                    | 0                               | 0   |   |   |    |    |
| 5                                    | 0                               | 0   | 0 |   |    |    |
| 10                                   | 0                               | 0   | 0 | 0 |    |    |
| 20                                   | 0                               | 0   | 0 | 0 | 0  |    |
|                                      | significant difference (p<0.05) |     |   |   |    |    |
|                                      | not significant                 |     |   |   |    |    |

Table S7. Statistically significant differences for disease incidence of cherry tomato fruits at different APF concentrations at day 6

| APF concentration, g L <sup>-1</sup> | 0                               | 0.5 | 2 | 5 | 10 | 20 |
|--------------------------------------|---------------------------------|-----|---|---|----|----|
| 0                                    |                                 |     |   |   |    |    |
| 0.5                                  | 2                               |     |   |   |    |    |
| 2                                    | 0                               | 0   |   |   |    |    |
| 5                                    | 0                               | 0   | 0 |   |    |    |
| 10                                   | 0                               | 0   | 0 | 0 |    |    |
| 20                                   | 0                               | 0   | 0 | 0 | 0  |    |
|                                      | significant difference (p<0.05) |     |   |   |    |    |
|                                      | not significant                 |     |   |   |    |    |

Table S8. Statistically significant differences for disease incidence of cherry tomato fruits at different APF concentrations at day 7

| APF concentration, g L <sup>-1</sup> | 0                               | 0.5 | 2 | 5 | 10 | 20 |
|--------------------------------------|---------------------------------|-----|---|---|----|----|
| 0                                    |                                 |     |   |   |    |    |
| 0.5                                  | 1                               |     |   |   |    |    |
| 2                                    |                                 | 1   |   |   |    |    |
| 5                                    | 3                               | 0   | 3 |   |    |    |
| 10                                   | 0                               | 0   | 0 | 0 |    |    |
| 20                                   | 0                               | 0   | 0 | 0 | 0  |    |
|                                      | significant difference (p<0.05) |     |   |   |    |    |
|                                      | not significant                 |     |   |   |    |    |

Table S9. Statistically significant differences for disease incidence of cherry tomato fruits at different days at APF concentration is 0 g L<sup>-1</sup>

| Days | 2                               | 3 | 4 | 5   | 6   | 7 |
|------|---------------------------------|---|---|-----|-----|---|
| 2    |                                 |   |   |     |     |   |
| 3    | 0                               |   |   |     |     |   |
| 4    | 0                               | 0 |   |     |     |   |
| 5    | 0                               | 0 | 0 |     |     |   |
| 6    | 0                               | 0 | 0 | 1.5 |     |   |
| 7    | 0                               | 0 | 0 | 1.5 | 1.5 |   |
|      | significant difference (p<0.05) |   |   |     |     |   |
|      | not significant                 |   |   |     |     |   |

Table S10. Statistically significant differences for disease incidence of cherry tomato fruits at different days at APF concentration is 0.5 g L<sup>-1</sup>

| Days | 2                               | 3 | 4 | 5 | 6 | 7 |
|------|---------------------------------|---|---|---|---|---|
| 2    |                                 |   |   |   |   |   |
| 3    | 0                               |   |   |   |   |   |
| 4    | 0                               | 0 |   |   |   |   |
| 5    | 0                               | 0 | 0 |   |   |   |
| 6    | 0                               | 0 | 0 | 0 |   |   |
| 7    | 0                               | 0 | 0 | 0 | 5 |   |
|      | significant difference (p<0.05) |   |   |   |   |   |
|      | not significant                 |   |   |   |   |   |

Table S11. Statistically significant differences for disease incidence of cherry tomato fruits at different days at APF concentration is 2 g L<sup>-1</sup>

| Days | 2                               | 3 | 4 | 5 | 6 | 7 |
|------|---------------------------------|---|---|---|---|---|
| 2    |                                 |   |   |   |   |   |
| 3    | 0                               |   |   |   |   |   |
| 4    | 0                               | 0 |   |   |   |   |
| 5    | 0                               | 0 | 0 |   |   |   |
| 6    | 0                               | 0 | 0 | 0 |   |   |
| 7    | 0                               | 0 | 0 | 0 | 0 |   |
|      | significant difference (p<0.05) |   |   |   |   |   |
|      | not significant                 |   |   |   |   |   |

Table S12. Statistically significant differences for disease incidence of cherry tomato fruits at different days at APF concentration is 5 g L<sup>-1</sup>

| Days | 2                               | 3 | 4 | 5 | 6 | 7 |
|------|---------------------------------|---|---|---|---|---|
| 2    |                                 |   |   |   |   |   |
| 3    | 0                               |   |   |   |   |   |
| 4    | 0                               | 0 |   |   |   |   |
| 5    | 0                               | 0 | 0 |   |   |   |
| 6    | 0                               | 0 | 0 | 0 |   |   |
| 7    | 0                               | 0 | 0 | 0 | 0 |   |
|      | significant difference (p<0.05) |   |   |   |   |   |
|      | not significant                 |   |   |   |   |   |

Table S13. Statistically significant differences for disease incidence of cherry tomato fruits at different days at APF concentration is 10 g L<sup>-1</sup>

| Days | 2 | 3 | 4 | 5 | 6 | 7 |
|------|---|---|---|---|---|---|
| 2    |   |   |   |   |   |   |
| 3    | 0 |   |   |   |   |   |
| 4    | 0 | 0 |   |   |   |   |
| 5    | 0 | 0 | 0 |   |   |   |
| 6    | 0 | 0 | 0 | 0 |   |   |
| 7    | 0 | 0 | 0 | 0 | 0 |   |

significant difference  
(p<0.05)

not significant

Table S14. Statistically significant differences for disease incidence of cherry tomato fruits at different days at APF concentration is 20 g L<sup>-1</sup>

| Days | 2 | 3 | 4 | 5 | 6 | 7 |
|------|---|---|---|---|---|---|
| 2    |   |   |   |   |   |   |
| 3    | 1 |   |   |   |   |   |
| 4    | 0 | 0 |   |   |   |   |
| 5    | 0 | 0 | 0 |   |   |   |
| 6    | 0 | 0 | 0 | 0 |   |   |
| 7    | 0 | 0 | 0 | 0 | 0 |   |

significant difference (p<0.05)

not significant
