# Supplementary material for: Lipopeptides Produced by Bacillus mojavensis P1709 as an Efficient Tool to Maintain Postharvest Cherry Tomato Quality and Quantity
Source: MDPI journal article supplement (doi:10.3390/agriculture12050609), 2022-04-26
Supplement: s1 [file s1]

Archive with 1 entries (1 files):
- agriculture-1614599-SI.pdf
